# Supplementary material
Source: publisher figshare collection journal article supplement (https://sage.figshare.com/ndownloader/files/17785418)
Supplement: Supplementary file 1 [file 17785418]

Reviewer 2 v2

Comments to the Author

The Authors have satisfied the reviewer's requests. I believe that the paper is now suitable for publication in "Therapeutic Advances in Respiratory Disease".
